# Supplementary material
Source: PubMed Central journal article supplement (PMC208813)
Supplement: pnas_100_20_11652__1.pdf [file pnas_100_20_11652__1.pdf]

## Supporting Text

### A Model For Random Cell Turnover

**Clonal Distribution as a Function of Turnover.** A model was developed to calculate the effect of random turnover in a closed cell population on the distribution of single and multicopy clones. The model considers multiple cycles of two alternating steps: (i) killing of a single cell at random in the population, and (ii) division of one of the remaining cells, also at random. After the first step, a clone that contained  $n$  members will contain  $n - 1$  members if one of its members is killed. In the second step, a clone that contained  $n$  members will contain  $n + 1$  members if one of its members divides. The number of cells killed from a clone is 0 or 1. The expected number of such killed cells is therefore  $1 \cdot p$  (a cell is killed from this clone), i.e. the probability that a cell is killed. Therefore, the number of clones containing  $n$  members after the first step will be decreased by the probability that a cell from one of these clones was killed, but increased by the probability that a cell from one of the clones containing  $n + 1$  members was killed. Similarly, after a single cell division, the number of clones containing  $n$  members will be decreased by the probability that a cell from one of these clones divided, but increased by the probability that a cell from one of the clones containing  $n - 1$  members divided. Let  $f(n, k)$  be the number of clones containing  $n$  members after the killing step of turnover cycle  $k$ , and  $F(n, k)$  be the number of clones containing  $n$  members after the division step of turnover cycle  $k$ . Then

After the first step  $f(n, k) = F(n, k - 1) / c - n \cdot F(n, k - 1) / c + (n + 1) \cdot F(n + 1, k - 1) / c$

After the second step  $F(n, k) = f(n, k) - n \cdot f(n, k) / (c - 1) + (n - 1) \cdot f(n - 1, k) / (c - 1)$

where  $c$  is the total number of cells in the population, and the probability of killing or division of a cell of a clone containing  $n$  members is equal to the total number of cells of

clones containing  $n$  members, divided by the total number of cells ( $c$ , before the first step, and  $c - 1$  before the second step ).

If we start with  $c$  cells, each of which is a member of a different clone, then with no cycles of killing and division

$$F(n = 1, 0) = c$$

$$F(n > 1, 0) = 0$$

And by definition:

$$f(0, k) \equiv 0$$

$F(n, k)$  may be calculated by recursive application of equations for the first and second steps for any value of  $k$  and  $1 \geq n \geq c$  .

**Adjustment for Efficiency of Detection.** The efficiency with which a cell is detected will influence the observed distribution of single and multicopy clones in a population. If a clone contains  $n$  members, each of which are detected with efficiency  $s$ , then the probability of detecting exactly  $a$  members of that clone is given by the binomial distribution,  $b(a, n, s)$  . Therefore the number of clones containing  $a$  members,  $G(n = a, k, s)$  will be the sum of the contributions of the “ $a$ ” term of the binomial distributions for all clones of size  $n$ , where  $n \geq a$  .

$$G(n = a, k, s) = \sum_{n=a}^c b(a, n, s) \cdot F(n, k)$$

**Clonal Complexity.** The observed clonal complexity of the population,  $C$ , is defined as the total number of clones detected divided by the total number of cells detected. The clonal complexity predicted by the model is:

$$C(k, s) = \sum_{n=1}^c [G(n, k, s) / c \cdot s]$$

Predicted values for the observed clonal complexities over a range of values of  $k$  and  $s$  are shown in Table 6.
