# Supplementary material
Source: PubMed Central journal article supplement (PMC208813)

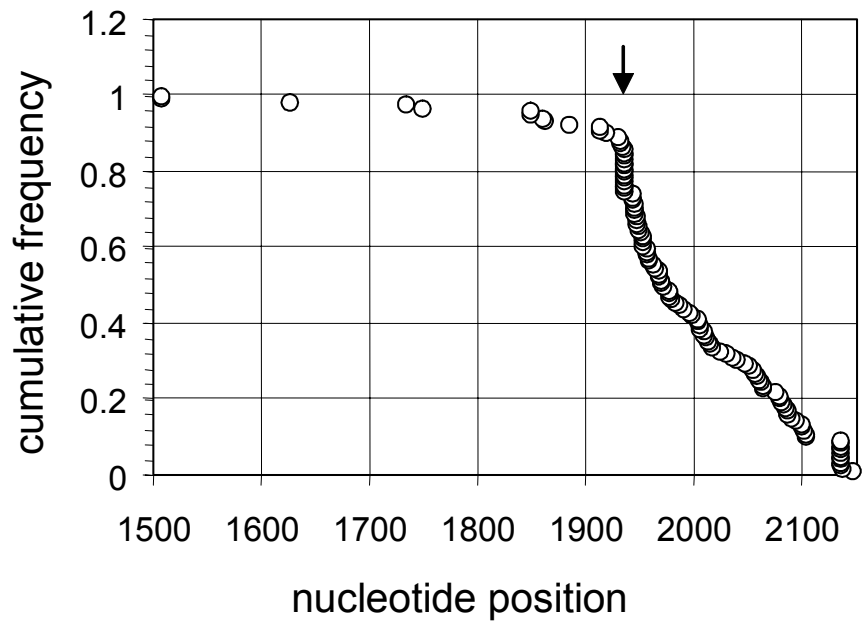

Supplement: pnas_100_20_11652__3.pdf [file pnas_100_20_11652__3.pdf]
